# Supplementary material for: The Spatiotemporal Dynamics and Microevolution Events That Favored the Success of the Highly Clonal Multidrug-Resistant Monophasic Salmonella Typhimurium Circulating in Europe
Source: Front Microbiol. 2021 May 21;12:651124. doi: 10.3389/fmicb.2021.651124 (PMC8175864; doi:10.3389/fmicb.2021.651124)
Supplement: Supplementary file 10 [file Table_9.xlsx]

## Sheet: Sheet1
Supplementary Table S9. Integration loci of the Salmonella Genomic Island 4 (SGI4).
#	Plasmid	tRNA-Phe-3.2Mb-3'	tRNA-Phe-3.2Mb-5'	tRNA-Phe-4.6Mb-3'	tRNA-Phe-4.6Mb-5'	SGI4	Integration
1	10CEB01160SAL_contigs.fasta	0	0	1	1	SGI4	tRNA-Phe-4.6Mb
2	10CEB1178SAL_contigs.fasta	0	0	1	1	SGI4	tRNA-Phe-4.6Mb
3	11CEB2326SAL_contigs.fasta	0	0	1	1	SGI4	tRNA-Phe-4.6Mb
4	11CEB2816SAL_contigs.fasta	0	0	1	1	SGI4	tRNA-Phe-4.6Mb
5	11CEB2817SAL_contigs.fasta	0	0	1	1	SGI4	tRNA-Phe-4.6Mb
6	11CEB2911SAL_contigs.fasta	0	0	1	1	SGI4	tRNA-Phe-4.6Mb
7	11CEB3431SAL_contigs.fasta	0	0	1	1	SGI4	tRNA-Phe-4.6Mb
8	11CEB3440SAL_contigs.fasta	0	0	1	1	SGI4	tRNA-Phe-4.6Mb
9	11CEB4681SAL_contigs.fasta	0	0	1	1	SGI4	tRNA-Phe-4.6Mb
10	11CEB6568SAL_contigs.fasta	0	0	1	1	SGI4	tRNA-Phe-4.6Mb
11	11CEB93SAL_contigs.fasta	0	0	1	1	SGI4	tRNA-Phe-4.6Mb
12	12CEB1033SAL_contigs.fasta	0	0	1	1	SGI4	tRNA-Phe-4.6Mb
13	12CEB1657SAL_contigs.fasta	0	0	1	1	SGI4	tRNA-Phe-4.6Mb
14	12CEB2472SAL_contigs.fasta	0	0	1	1	SGI4	tRNA-Phe-4.6Mb
15	12CEB2551SAL_contigs.fasta	0	0	1	1	SGI4	tRNA-Phe-4.6Mb
16	12CEB4512SAL_contigs.fasta	0	0	1	1	SGI4	tRNA-Phe-4.6Mb
17	12CEB485SAL_contigs.fasta	0	0	1	1	SGI4	tRNA-Phe-4.6Mb
18	12CEB4916SAL_contigs.fasta	0	0	1	1	SGI4	tRNA-Phe-4.6Mb
19	180911-18-6566_contigs.fasta	0	0	1	1	SGI4	tRNA-Phe-4.6Mb
20	180911-18-6567_contigs.fasta	0	0	1	1	SGI4	tRNA-Phe-4.6Mb
21	180911-18-6569_contigs.fasta	0	0	1	1	SGI4	tRNA-Phe-4.6Mb
22	180911-18-6570_contigs.fasta	0	0	1	1	SGI4	tRNA-Phe-4.6Mb
23	180911-18-6572_contigs.fasta	0	0	1	1	SGI4	tRNA-Phe-4.6Mb
24	180911-18-6573_contigs.fasta	0	0	1	1	SGI4	tRNA-Phe-4.6Mb
25	180911-18-6576_contigs.fasta	0	0	1	1	SGI4	tRNA-Phe-4.6Mb
26	180911-18-6577_contigs.fasta	0	1	1	0	SGI4	2Check
27	180911-18-6579_contigs.fasta	0	0	1	1	SGI4	tRNA-Phe-4.6Mb
28	180911-18-6580_contigs.fasta	0	0	1	1	SGI4	tRNA-Phe-4.6Mb
29	180911-18-6581_contigs.fasta	0	0	1	1	SGI4	tRNA-Phe-4.6Mb
30	2006LSAL01890_contigs.fasta	0	0	1	1	SGI4	tRNA-Phe-4.6Mb
31	2008LSAL08547_contigs.fasta	0	0	1	1	SGI4	tRNA-Phe-4.6Mb
32	2009LSAL04654_contigs.fasta	0	0	1	1	SGI4	tRNA-Phe-4.6Mb
33	2009LSAL09229_contigs.fasta	0	0	1	1	SGI4	tRNA-Phe-4.6Mb
34	2010LSAL00144_contigs.fasta	0	0	1	1	SGI4	tRNA-Phe-4.6Mb
35	2010LSAL00169_contigs.fasta	1	1	0	0	SGI4	tRNA-Phe-3.2Mb
36	2013LSAL02233_contigs.fasta	0	0	1	1	SGI4	tRNA-Phe-4.6Mb
37	2013LSAL03045_contigs.fasta	1	1	0	0	SGI4	tRNA-Phe-3.2Mb
38	2013LSAL03823_contigs.fasta	0	0	1	1	SGI4	tRNA-Phe-4.6Mb
39	2013LSAL04650_contigs.fasta	0	0	1	1	SGI4	tRNA-Phe-4.6Mb
40	2014LSAL00330_contigs.fasta	1	1	0	0	SGI4	tRNA-Phe-3.2Mb
41	2014LSAL01907_contigs.fasta	0	0	1	1	SGI4	tRNA-Phe-4.6Mb
42	2014LSAL02850_contigs.fasta	0	0	1	1	SGI4	tRNA-Phe-4.6Mb
43	2014LSAL03156_contigs.fasta	0	0	1	1	SGI4	tRNA-Phe-4.6Mb
44	ERR1540278_contigs.fasta	0	0	1	1	SGI4	tRNA-Phe-4.6Mb
45	ERR1540346_contigs.fasta	0	0	1	1	SGI4	tRNA-Phe-4.6Mb
46	ERR1540441_contigs.fasta	0	0	1	1	SGI4	tRNA-Phe-4.6Mb
47	ERR1540476_contigs.fasta	0	0	1	1	SGI4	tRNA-Phe-4.6Mb
48	ERR1540508_contigs.fasta	0	0	1	1	SGI4	tRNA-Phe-4.6Mb
49	ERR1744967_contigs.fasta	0	0	1	1	SGI4	tRNA-Phe-4.6Mb
50	ERR1744968_contigs.fasta	0	0	1	1	SGI4	tRNA-Phe-4.6Mb
51	ERR1744969_contigs.fasta	0	0	1	1	SGI4	tRNA-Phe-4.6Mb
52	ERR1744970_contigs.fasta	0	0	1	1	SGI4	tRNA-Phe-4.6Mb
53	ERR1744971_contigs.fasta	0	0	1	1	SGI4	tRNA-Phe-4.6Mb
54	ERR1744972_contigs.fasta	0	0	1	1	SGI4	tRNA-Phe-4.6Mb
55	ERR1843316_contigs.fasta	0	0	1	1	SGI4	tRNA-Phe-4.6Mb
56	ERR1843326_contigs.fasta	0	0	1	1	SGI4	tRNA-Phe-4.6Mb
57	ERR1843330_contigs.fasta	0	0	1	1	SGI4	tRNA-Phe-4.6Mb
58	ERR1843332_contigs.fasta	0	0	1	1	SGI4	tRNA-Phe-4.6Mb
59	ERR1843337_contigs.fasta	0	0	1	1	SGI4	tRNA-Phe-4.6Mb
60	ERR1917141_contigs.fasta	0	0	1	1	SGI4	tRNA-Phe-4.6Mb
61	ERR1917157_contigs.fasta	0	0	1	1	SGI4	tRNA-Phe-4.6Mb
62	ERR2003330_contigs.fasta	0	0	1	1	SGI4	tRNA-Phe-4.6Mb
63	ERR2003331_contigs.fasta	0	0	1	1	SGI4	tRNA-Phe-4.6Mb
64	ERR2003332_contigs.fasta	0	0	1	1	SGI4	tRNA-Phe-4.6Mb
65	ERR2003334_contigs.fasta	0	0	1	1	SGI4	tRNA-Phe-4.6Mb
66	ERR2003335_contigs.fasta	0	0	1	1	SGI4	tRNA-Phe-4.6Mb
67	ERR2003341_contigs.fasta	0	0	1	1	SGI4	tRNA-Phe-4.6Mb
68	ERR2174766_contigs.fasta	0	0	1	1	SGI4	tRNA-Phe-4.6Mb
69	ERR2174767_contigs.fasta	0	0	1	1	SGI4	tRNA-Phe-4.6Mb
70	ERR2174768_contigs.fasta	0	0	1	1	SGI4	tRNA-Phe-4.6Mb
71	ERR2174769_contigs.fasta	0	0	1	1	SGI4	tRNA-Phe-4.6Mb
72	ERR2174778_contigs.fasta	0	0	1	1	SGI4	tRNA-Phe-4.6Mb
73	ERR2174779_contigs.fasta	0	0	1	1	SGI4	tRNA-Phe-4.6Mb
74	ERR2174782_contigs.fasta	0	0	1	1	SGI4	tRNA-Phe-4.6Mb
75	ERR2174786_contigs.fasta	0	0	1	1	SGI4	tRNA-Phe-4.6Mb
76	ERR2174788_contigs.fasta	0	0	1	1	SGI4	tRNA-Phe-4.6Mb
77	ERR2174790_contigs.fasta	0	0	1	1	SGI4	tRNA-Phe-4.6Mb
78	ERR2174791_contigs.fasta	0	0	1	1	SGI4	tRNA-Phe-4.6Mb
79	ERR2174793_contigs.fasta	0	0	1	1	SGI4	tRNA-Phe-4.6Mb
80	ERR2174794_contigs.fasta	0	0	1	1	SGI4	tRNA-Phe-4.6Mb
81	ERR2174795_contigs.fasta	0	0	1	1	SGI4	tRNA-Phe-4.6Mb
82	ERR2174800_contigs.fasta	0	0	1	1	SGI4	tRNA-Phe-4.6Mb
83	ERR2174801_contigs.fasta	0	0	1	1	SGI4	tRNA-Phe-4.6Mb
84	ERR2174810_contigs.fasta	0	0	1	1	SGI4	tRNA-Phe-4.6Mb
85	ERR2174811_contigs.fasta	0	0	1	1	SGI4	tRNA-Phe-4.6Mb
86	ERR2174812_contigs.fasta	0	0	1	1	SGI4	tRNA-Phe-4.6Mb
87	ERR2174813_contigs.fasta	0	0	1	1	SGI4	tRNA-Phe-4.6Mb
88	ERR2174828_contigs.fasta	0	0	1	1	SGI4	tRNA-Phe-4.6Mb
89	ERR2174829_contigs.fasta	0	0	1	1	SGI4	tRNA-Phe-4.6Mb
90	ERR2174830_contigs.fasta	0	0	1	1	SGI4	tRNA-Phe-4.6Mb
91	ERR2174831_contigs.fasta	0	0	1	1	SGI4	tRNA-Phe-4.6Mb
92	ERR2174832_contigs.fasta	0	0	1	1	SGI4	tRNA-Phe-4.6Mb
93	ERR2174850_contigs.fasta	0	0	1	1	SGI4	tRNA-Phe-4.6Mb
94	ERR2174851_contigs.fasta	0	0	1	1	SGI4	tRNA-Phe-4.6Mb
95	ERR2174852_contigs.fasta	0	0	1	1	SGI4	tRNA-Phe-4.6Mb
96	ERR2174853_contigs.fasta	0	0	1	1	SGI4	tRNA-Phe-4.6Mb
97	ERR2174854_contigs.fasta	0	0	1	1	SGI4	tRNA-Phe-4.6Mb
98	ERR2174855_contigs.fasta	0	0	1	1	SGI4	tRNA-Phe-4.6Mb
99	ERR2174856_contigs.fasta	0	0	1	1	SGI4	tRNA-Phe-4.6Mb
100	ERR2174857_contigs.fasta	0	0	1	1	SGI4	tRNA-Phe-4.6Mb
101	ERR2174865_contigs.fasta	0	0	1	1	SGI4	tRNA-Phe-4.6Mb
102	ERR2174866_contigs.fasta	0	0	1	1	SGI4	tRNA-Phe-4.6Mb
103	ERR2174867_contigs.fasta	0	0	1	1	SGI4	tRNA-Phe-4.6Mb
104	ERR2174892_contigs.fasta	0	0	1	1	SGI4	tRNA-Phe-4.6Mb
105	ERR2174893_contigs.fasta	0	0	1	1	SGI4	tRNA-Phe-4.6Mb
106	ERR2174894_contigs.fasta	0	0	1	1	SGI4	tRNA-Phe-4.6Mb
107	ERR2174896_contigs.fasta	0	0	1	1	SGI4	tRNA-Phe-4.6Mb
108	ERR2187916_contigs.fasta	0	0	1	1	SGI4	tRNA-Phe-4.6Mb
109	ERR2262538_contigs.fasta	1	1	0	0	SGI4	tRNA-Phe-3.2Mb
110	ERR2262544_contigs.fasta	0	0	1	1	SGI4	tRNA-Phe-4.6Mb
111	ERR2382749_contigs.fasta	0	0	1	1	SGI4	tRNA-Phe-4.6Mb
112	ERR2382756_contigs.fasta	1	1	0	0	SGI4	tRNA-Phe-3.2Mb
113	ERR2382771_contigs.fasta	1	1	0	0	SGI4	tRNA-Phe-3.2Mb
114	ERR2382776_contigs.fasta	0	0	1	1	SGI4	tRNA-Phe-4.6Mb
115	ERR2382790_contigs.fasta	1	1	0	0	SGI4	tRNA-Phe-3.2Mb
116	ERR2382792_contigs.fasta	0	0	1	1	SGI4	tRNA-Phe-4.6Mb
117	ERR2382798_contigs.fasta	0	0	1	1	SGI4	tRNA-Phe-4.6Mb
118	ERR2382813_contigs.fasta	0	0	1	0	ToCheck	2Check
119	ERR2382815_contigs.fasta	1	1	0	0	SGI4	tRNA-Phe-3.2Mb
120	ERR2382817_contigs.fasta	0	0	1	1	SGI4	tRNA-Phe-4.6Mb
121	ERR2382838_contigs.fasta	0	0	1	1	SGI4	tRNA-Phe-4.6Mb
122	ERR2382844_contigs.fasta	0	0	1	1	SGI4	tRNA-Phe-4.6Mb
123	ERR2689725_contigs.fasta	0	0	1	1	SGI4	tRNA-Phe-4.6Mb
124	ERR2689733_contigs.fasta	0	0	1	1	SGI4	tRNA-Phe-4.6Mb
125	ERR2689737_contigs.fasta	0	0	1	1	SGI4	tRNA-Phe-4.6Mb
126	ERR2689739_contigs.fasta	0	0	1	1	SGI4	tRNA-Phe-4.6Mb
127	ERR2689740_contigs.fasta	0	0	1	1	SGI4	tRNA-Phe-4.6Mb
128	ERR2689742_contigs.fasta	0	0	1	1	SGI4	tRNA-Phe-4.6Mb
129	ERR2849891_contigs.fasta	0	0	1	1	SGI4	tRNA-Phe-4.6Mb
130	ERR2849892_contigs.fasta	0	0	1	1	SGI4	tRNA-Phe-4.6Mb
131	ERR2849893_contigs.fasta	0	0	1	1	SGI4	tRNA-Phe-4.6Mb
132	ERR2849894_contigs.fasta	0	0	1	1	SGI4	tRNA-Phe-4.6Mb
133	ERR2849895_contigs.fasta	1	1	0	0	SGI4	tRNA-Phe-3.2Mb
134	ERR2849896_contigs.fasta	0	0	1	1	SGI4	tRNA-Phe-4.6Mb
135	ERR2849897_contigs.fasta	0	0	1	1	SGI4	tRNA-Phe-4.6Mb
136	ERR2849898_contigs.fasta	0	0	1	1	SGI4	tRNA-Phe-4.6Mb
137	ERR2849899_contigs.fasta	0	0	1	1	SGI4	tRNA-Phe-4.6Mb
138	ERR2849900_contigs.fasta	0	0	1	1	SGI4	tRNA-Phe-4.6Mb
139	ERR2849901_contigs.fasta	0	0	1	1	SGI4	tRNA-Phe-4.6Mb
140	ERR2849902_contigs.fasta	1	1	0	0	SGI4	tRNA-Phe-3.2Mb
141	ERR2849903_contigs.fasta	0	0	1	1	SGI4	tRNA-Phe-4.6Mb
142	ERR2849904_contigs.fasta	0	0	1	1	SGI4	tRNA-Phe-4.6Mb
143	ERR2849905_contigs.fasta	0	0	1	1	SGI4	tRNA-Phe-4.6Mb
144	ERR2849906_contigs.fasta	0	0	1	1	SGI4	tRNA-Phe-4.6Mb
145	ERR2849907_contigs.fasta	0	0	1	1	SGI4	tRNA-Phe-4.6Mb
146	ERR2849908_contigs.fasta	0	0	1	1	SGI4	tRNA-Phe-4.6Mb
147	ERR2849909_contigs.fasta	0	0	1	1	SGI4	tRNA-Phe-4.6Mb
148	ERR2849910_contigs.fasta	0	0	1	1	SGI4	tRNA-Phe-4.6Mb
149	ERR2849911_contigs.fasta	0	0	1	1	SGI4	tRNA-Phe-4.6Mb
150	ERR2849912_contigs.fasta	0	0	1	1	SGI4	tRNA-Phe-4.6Mb
151	ERR2849913_contigs.fasta	1	1	0	0	SGI4	tRNA-Phe-3.2Mb
152	ERR2849914_contigs.fasta	0	0	1	1	SGI4	tRNA-Phe-4.6Mb
153	ERR2849916_contigs.fasta	0	0	1	1	SGI4	tRNA-Phe-4.6Mb
154	ERR2849917_contigs.fasta	0	0	1	1	SGI4	tRNA-Phe-4.6Mb
155	ERR2849918_contigs.fasta	0	0	1	1	SGI4	tRNA-Phe-4.6Mb
156	ERR2849919_contigs.fasta	0	0	1	1	SGI4	tRNA-Phe-4.6Mb
157	ERR2849920_contigs.fasta	0	0	1	1	SGI4	tRNA-Phe-4.6Mb
158	ERR2849921_contigs.fasta	0	0	1	1	SGI4	tRNA-Phe-4.6Mb
159	ERR2849922_contigs.fasta	0	0	1	1	SGI4	tRNA-Phe-4.6Mb
160	ERR2849923_contigs.fasta	0	0	1	1	SGI4	tRNA-Phe-4.6Mb
161	ERR2849924_contigs.fasta	0	0	1	1	SGI4	tRNA-Phe-4.6Mb
162	ERR2849925_contigs.fasta	0	0	1	1	SGI4	tRNA-Phe-4.6Mb
163	ERR2849926_contigs.fasta	0	0	1	1	SGI4	tRNA-Phe-4.6Mb
164	ERR2849927_contigs.fasta	0	0	1	1	SGI4	tRNA-Phe-4.6Mb
165	ERR2849938_contigs.fasta	0	0	1	1	SGI4	tRNA-Phe-4.6Mb
166	ERR2849939_contigs.fasta	0	0	1	1	SGI4	tRNA-Phe-4.6Mb
167	ERR2849940_contigs.fasta	0	0	1	1	SGI4	tRNA-Phe-4.6Mb
168	ERR2849941_contigs.fasta	0	0	1	1	SGI4	tRNA-Phe-4.6Mb
169	ERR2849942_contigs.fasta	0	0	1	1	SGI4	tRNA-Phe-4.6Mb
170	ERR2849943_contigs.fasta	0	0	1	1	SGI4	tRNA-Phe-4.6Mb
171	H07_166_0082_contigs.fasta	0	0	1	1	SGI4	tRNA-Phe-4.6Mb
172	H07_230_0280_contigs.fasta	0	0	1	1	SGI4	tRNA-Phe-4.6Mb
173	H07_276_0382_contigs.fasta	0	0	1	1	SGI4	tRNA-Phe-4.6Mb
174	H100120548_contigs.fasta	0	0	1	1	SGI4	tRNA-Phe-4.6Mb
175	H100800267_contigs.fasta	0	0	1	1	SGI4	tRNA-Phe-4.6Mb
176	L00248-12_contigs.fasta	0	0	1	1	SGI4	tRNA-Phe-4.6Mb
177	L01066-08_contigs.fasta	0	0	1	1	SGI4	tRNA-Phe-4.6Mb
178	L01204-11_contigs.fasta	1	1	0	0	SGI4	tRNA-Phe-3.2Mb
179	L01469-09_contigs.fasta	0	0	1	1	SGI4	tRNA-Phe-4.6Mb
180	L01673-18_contigs.fasta	0	0	1	1	SGI4	tRNA-Phe-4.6Mb
181	L01730-06_contigs.fasta	0	0	1	1	SGI4	tRNA-Phe-4.6Mb
182	S00065-06_contigs.fasta	0	0	1	1	SGI4	tRNA-Phe-4.6Mb
183	S01569-10_contigs.fasta	0	0	1	1	SGI4	tRNA-Phe-4.6Mb
184	S01668-11_contigs.fasta	0	0	1	1	SGI4	tRNA-Phe-4.6Mb
185	S01861-18_contigs.fasta	0	0	1	1	SGI4	tRNA-Phe-4.6Mb
186	S03113-10_contigs.fasta	0	0	1	1	SGI4	tRNA-Phe-4.6Mb
187	S03371-07_contigs.fasta	0	0	1	1	SGI4	tRNA-Phe-4.6Mb
188	S0344408_contigs.fasta	0	0	1	1	SGI4	tRNA-Phe-4.6Mb
189	S03445-08_contigs.fasta	0	0	1	1	SGI4	tRNA-Phe-4.6Mb
190	S03447-05_contigs.fasta	0	0	1	1	SGI4	tRNA-Phe-4.6Mb
191	S03732-17_contigs.fasta	0	0	1	1	SGI4	tRNA-Phe-4.6Mb
192	S04698-09_contigs.fasta	0	0	1	1	SGI4	tRNA-Phe-4.6Mb
193	STY50_contigs.fasta	0	0	1	1	SGI4	tRNA-Phe-4.6Mb
